# Supplementary material for: Regulators of Lysosome Function and Dynamics in Caenorhabditis elegans
Source: PubMed Central journal article supplement (PMC5345728; doi:10.1534/g3.116.037515), 2017-01-24
Supplement: 991FigureS8.pdf [file 991FigureS8.pdf]

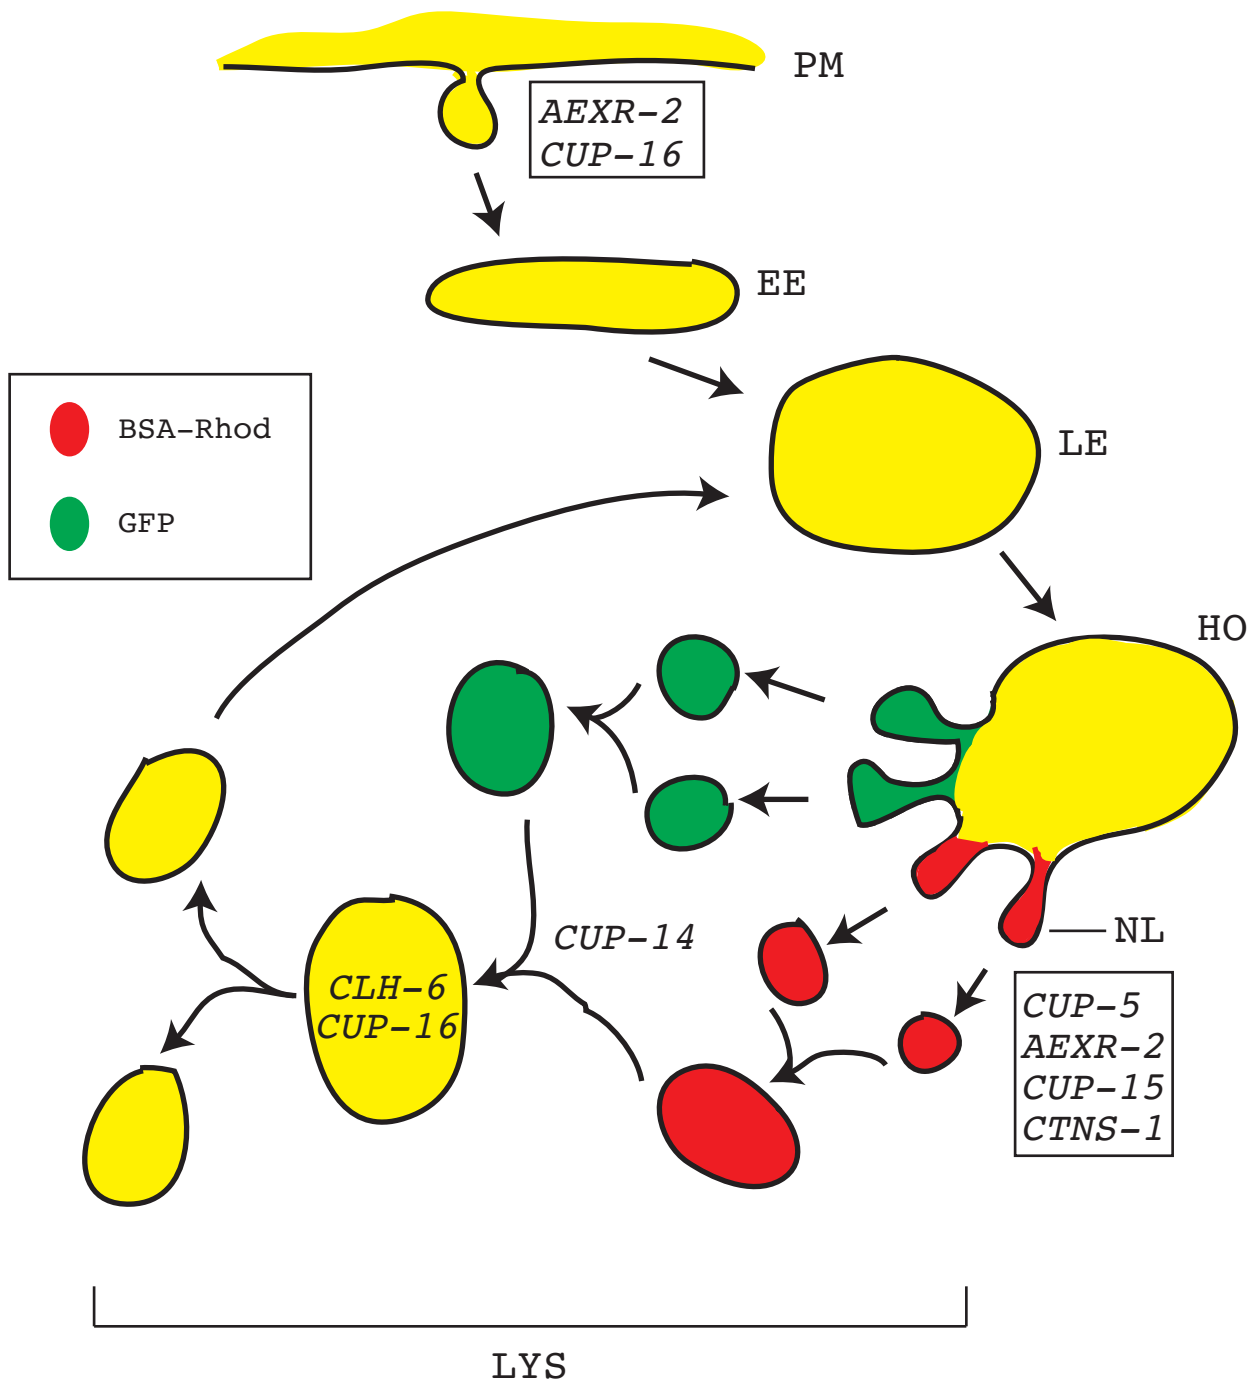

**Figure S8** Model of novel CUP functions at the plasma membrane and endosomes. Shown is a simplified schematic of an endocytic pathway with presumed functions for the newly identified CUP proteins. EE = Early Endosome; HO = Hybrid Organelle; LE = Late Endosome; LYS = Lysosome; NL = Nascent Lysosome; PM = Plasma Membrane.
